# Supplementary material for: Adsorption of azide-functionalized thiol linkers on zinc oxide surfaces
Source: PubMed Central journal article supplement (PMC8694732; doi:10.1039/d0ra05127f), 2021-01-29
Supplement: RA-011-D0RA05127F-s001.pdf [file RA-011-D0RA05127F-s001.pdf]

## Supplementary Information

### Adsorption of azide-functionalized thiol linkers on zinc oxide surfaces

Petia Atanasova<sup>1</sup>, Maofeng Dou<sup>2</sup>, Shravan R. Kousik<sup>1</sup>, Joachim  
Bill<sup>1</sup>, and Maria Fyta<sup>2</sup>

<sup>1</sup>*Institute for Materials Science, University of Stuttgart, Heisenbergstr. 3 70569  
Stuttgart, Germany*

<sup>2</sup>*Institute for Computational Physics, University of Stuttgart, Allmandring 3, 70569  
Stuttgart, Germany*

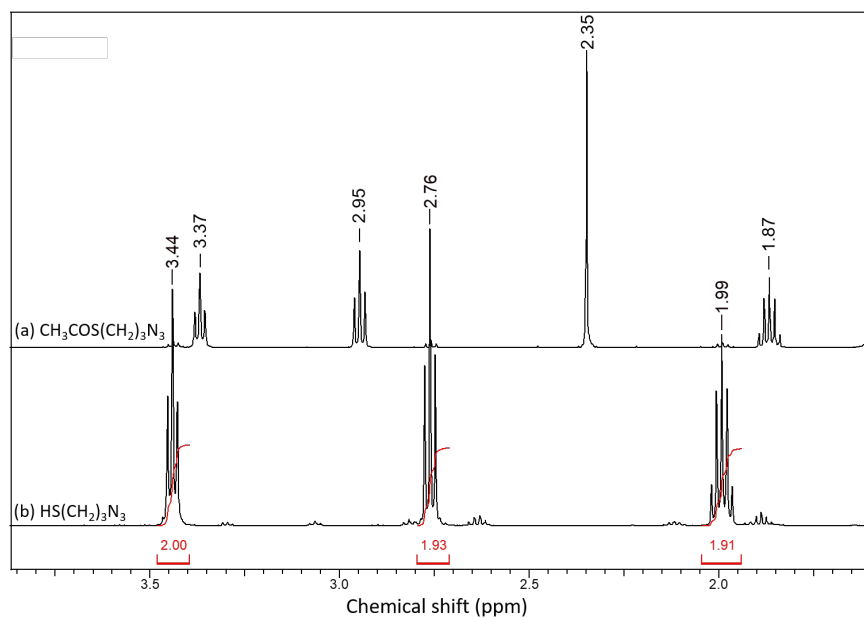

Figure 1:  $^1\text{H}$  NMR spectra of (a) S-(3-azidopropyl) thioacetate and (b) 3-azidopropyl thiol.

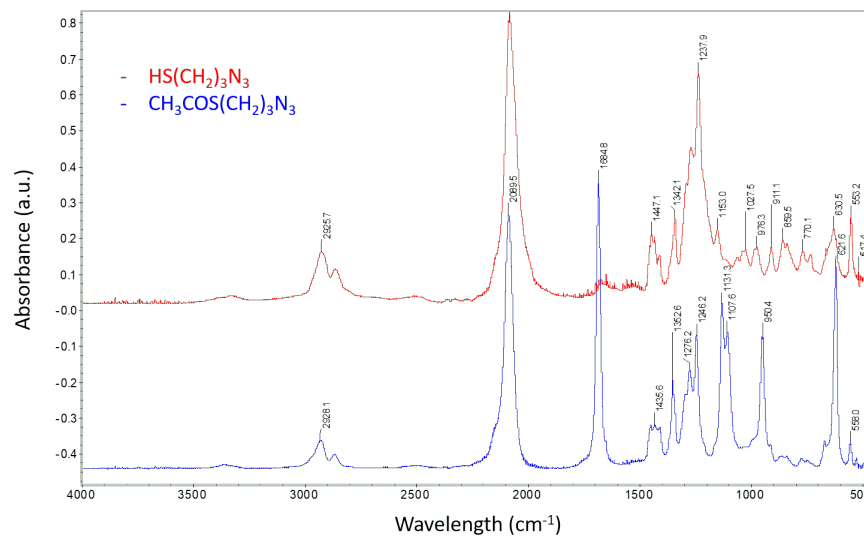

Figure 2: FTIR-ATR spectra of S-(3-azidopropyl) thioacetate (blue curve) and 3-azidopropyl thiol (red curve).
